# Supplementary material
Source: publisher figshare collection journal article supplement (https://wiley.figshare.com/ndownloader/files/8010448)
Supplement: Supplementary file 1 [file 8010448]

## Sheet: Sheet1
Human Primer's name	Forward	Reverse	Bio-Rad Assay ID	Name
MyoD	GGTCCCTCGCGCCCAAAAGATT	CAGTTCTCCCGCCTCTCCTACCTCAA
Myogenin	TGGAGCTGTATGAGACATCC	CTCGTAGCCTGGTGGTTC
Mib2	CTACGAGACCGCTCACTC	CCTTCGCTCCCTGGAAAATG
PAX7			qHsaCID0016103	paired box 7
MEF2C			qHsaCID0012414	myocyte enhancer factor 2C
CDK6			qHsaCID0010553	cyclin-dependent kinase 6
CDK2			qHsaCED0043984	cyclin-dependent kinase 2
CCND1			qHsaCID0013833	cyclin D1
B2M			qHsaCID0015347	beta-2-microglobulin
RB1			qHsaCID0007095	retinoblastoma 1
NPM1			qHsaCED0038211	nucleophosmin (nucleolar phosphoprotein B23, numatrin)
MDM2			qHsaCID0011000	Mdm2 p53 binding protein homolog (mouse)
